# Supplementary material
Source: PubMed Central journal article supplement (PMC6425142)
Supplement: MCB.00528-18-s0003.pdf [file MCB.00528-18-s0003.pdf]

| REAGENT or RESOURCE                             | SOURCE                    | IDENTIFIER             |
|-------------------------------------------------|---------------------------|------------------------|
| <b>Antibodies</b>                               |                           |                        |
| PPAR $\alpha$ : Rabbit polyclonal to PPAR alpha | Abcam                     | Ab24509                |
| PPAR $\beta$ : Rabbit polyclonal to PPAR beta   | Thermo Fisher Scientific  | #PA1-823A              |
| PPAR $\gamma$ : Rabbit polyclonal to PPAR gamma | Cell Signaling Technology | #2443                  |
| PGC1 $\alpha$ : Rabbit polyclonal to PGC1 alpha | Thermo Fisher Scientific  | # PA5-38021            |
| PGC1 $\beta$ : Rabbit polyclonal to PGC1 beta   | Abcam                     | Ab176328               |
| Mef2a: Rabbit polyclonal to Mef2a               | Abcam                     | Ab86755                |
| Mef2b: Rabbit polyclonal to Mef2b               | Abcam                     | Ab33540                |
| Mef2c: Rabbit monoclonal to Mef2c               | Cell Signaling Technology | #5030                  |
| Mef2d: Rabbit polyclonal to MEF2D               | Abcam                     | Ab32845                |
| Myf5: Rabbit polyclonal to Myf5                 | Abcam                     | Ab125301               |
| Myf6: Rabbit polyclonal to Myf6                 | Sigma-Aldrich             | AV32135                |
| Myh1: Rabbit polyclonal to MYH1                 | Abcam                     | Ab127539               |
| Myh2: mouse monoclonal to Myh2                  | Santa Cruz Biotechnology  | Sc-53059               |
| Myh4: mouse monoclonal to Myh4                  | Thermo Fisher Scientific  | #14-6503-82            |
| Myh7: mouse monoclonal to Myh7                  | Santa Cruz Biotechnology  | Sc-53090               |
| MyoD: mouse monoclonal to MyoD                  | Thermo Fisher Scientific  | <b>Cat #</b> MA1-41017 |
| Tfam: Rabbit polyclonal to Tfam                 | Abcam                     | Ab131607               |
| Nrf1: Rabbit monoclonal to Nrf1                 | Cell Signaling Technology | #46743                 |
| Ndufb2: Rabbit monoclonal to Ndufb2             | Abcam                     | Ab186748               |
| Ndufa3: Rabbit polyclonal to Ndufa3             | Thermo Fisher Scientific  | PA5-70571              |
| Cox5b: Mouse monoclonal to Cox5b                | Abcam                     | Ab110263               |
| Cox7c: Rabbit polyclonal to Cox7c               | Thermo Fisher Scientific  | PA5-51284              |
| Atp5o: Rabbit polyclonal to Atp5o               | Thermo Fisher Scientific  | PA5-68104              |
| RPL26: Rabbit polyclonal to RPL26               | Sigma                     | SAB2107642             |
| Rabbit monoclonal to AKT1                       | Cell signaling            | 2938                   |
| Mouse monoclonal to AKT2                        | Thermo Fisher Scientific  | MA1-034                |
| Mouse monoclonal to AKT                         | Cell signaling            | 2920                   |
| Rabbit monoclonal to P-AKT(T308)                | Cell signaling            | 4056                   |
| Rabbit monoclonal to P-AKT(S473)                | Cell signaling            | 4060                   |
| Rabbit polyclonal to AMPK                       | Cell signaling            | 2532                   |
| Rabbit polyclonal to P-AMPK(T172/183)           | Abcam                     | ab23875                |
| Rabbit monoclonal to Foxo3a                     | Cell signaling            | 2497                   |
| Rabbit monoclonal to P-Foxo3a(S253)             | Cell signaling            | 13129                  |
| Rabbit monoclonal to P-Foxo3a(S413)             | Cell signaling            | 8174                   |
| Rabbit monoclonal to Foxo1                      | Cell signaling            | 2880                   |
| Mouse monoclonal to Puromycin                   | Kerafast                  | 3RH11                  |

|                                                 |                                 |                  |
|-------------------------------------------------|---------------------------------|------------------|
| mouse monoclonal to MAFbx                       | Santa Cruz<br>Biotechnology     | Sc-166806        |
| mouse monoclonal to MURF1                       | Santa Cruz<br>Biotechnology     | Sc-398608        |
| Rabbit polyclonal to S6K                        | Cell signaling                  | 9202             |
| Rabbit polyclonal to P-S6K(T389)                | Cell signaling                  | 9205             |
| Rabbit polyclonal to 4E-BP1                     | Cell signaling                  | 9452             |
| Rabbit polyclonal to P-4EBP1(T37/46):           | Cell signaling                  | 9459             |
| Rabbit polyclonal to P-4EBP1(S65)               | Cell signaling                  | 9451             |
| mouse monoclonal to Insulin Receptor $\beta$    | Cell signaling                  | 3025             |
| Rabbit polyclonal to P-InsRec (T1131)           | Cell signaling                  | 3021             |
| Rabbit polyclonal to Gsk3 $\alpha$              | Cell signaling                  | 9338             |
| Rabbit polyclonal to P-Gsk3 $\alpha$ (S21)      | Cell signaling                  | 8452             |
| Rabbit monoclonal to Gsk3 $\beta$               | Cell signaling                  | 12456            |
| Rabbit polyclonal to P-Gsk3 $\beta$ (S9)        | Cell signaling                  | 9336             |
| Rabbit polyclonal to eIf2B $\epsilon$           | Cell signaling                  | 3595             |
| Rabbit polyclonal to P-eIf2B $\epsilon$ (S540)  | Cell signaling                  | 3596             |
| Rabbit polyclonal to P- eIf2B $\epsilon$ (S536) | Thermo Fisher<br>Invitrogen     | 44-530G          |
| Rabbit polyclonal to IGF1R                      | Cell signaling                  | 3027             |
| Rabbit polyclonal to P-IGF1R(T1316)             | Cell signaling                  | 6113             |
| Rabbit polyclonal to IRS1                       | Cell signaling                  | 2390             |
| Rabbit polyclonal to P-IRS(Y608)                | Millipore                       | 09-432           |
| mouse monoclonal to S6                          | Cell signaling                  | 2317             |
| Rabbit polyclonal to p-S6(S240/244)             | Cell signaling                  | 2215             |
| Chemicals, Peptides, and Recombinant Proteins   |                                 |                  |
| D-Glucose                                       | Sigma-Aldrich                   | G8279            |
| Humulin® R U-100                                | Eli Lilly                       | U-100            |
| Phosphate buffered saline (PBS)                 | Boston BioProducts              | BM-220           |
| Tissue-Tek® O.C.T. compound 4583                | VWR                             | 25608-930        |
| Bovine Serum Albumin (BSA)                      | Sigma-Aldrich                   | A7906            |
| Isoflurane, USP                                 | Piramal Healthcare              | NDC 66794-017-10 |
| Paraformaldehyde 16% solution, EM Grade         | Electron Microscopy<br>Sciences | 15710            |
| Sodium meta-periodate                           | Fischer Scientific              | S398-100         |
| L-Lysine Hydrochloride                          | Fischer Scientific              | BP386-100        |
| Vectashield with DAPI                           | Vector Laboratories,<br>Inc     | H-1200           |
| Phosphatase inhibitor cocktail set              | Millipore                       | 524625           |
| NuPAGE™ 4-12% Bis-Tris Protein Gels             | Invitrogen                      | NP0321BOX        |
| Potassium chloride                              | Sigma Aldrich                   | P9333            |
| Magnesium chloride                              | Sigma Aldrich                   | M9272            |
| Ethylenediaminetetraacetic acid (EDTA)          | Sigma Aldrich                   | EDS              |
| Glycerol                                        | Sigma Aldrich                   | G5516            |
| Triton X-100                                    | Sigma Aldrich                   | X-100            |
| Trizma® base                                    | Sigma Aldrich                   | T1503            |
| Hydrochloric acid                               | Sigma Aldrich                   | 320331           |
| Dithiothreitol (DTT)                            | Sigma Aldrich                   | D0632            |
| Puromycin                                       | InVivoGen                       | ANT-PR-1         |

|                                                                          |                             |             |
|--------------------------------------------------------------------------|-----------------------------|-------------|
| Ketamine                                                                 |                             |             |
| Xylacine                                                                 |                             |             |
| Brilliant Blue R                                                         | Sigma Aldrich               | B0149       |
| RNase Inhibitor                                                          | ThermoFisher Scientific     | N8080119    |
| Cycloheximide                                                            | Sigma Aldrich               | C7698       |
| Pierce Protease Inhibitor tablets                                        | ThermoFisher Scientific     | A32963      |
| Sucrose                                                                  | Sigma Aldrich               | S9378       |
| TRIzol™ Reagent                                                          | Invitrogen                  | 15596026    |
| Collagenase A                                                            | Sigma Aldrich               | 10103578001 |
| FFA-free BSA solution                                                    | Sigma Aldrich               | A9205       |
| Dulbecco's Modified Eagle Medium (DMEM)                                  | ThermoFisher Scientific     | 11995-040   |
| Gentamycin                                                               | ThermoFisher Scientific     | 15750060    |
| Penicillin-Streptomycin                                                  | ThermoFisher Scientific     | 15140122    |
| FBS                                                                      | Sigma Aldrich               | F6178       |
| L-carnitine inner salt                                                   | Sigma Aldrich               | C0158       |
| Sodium chloride                                                          | Sigma Aldrich               | S7653       |
| Calcium chloride                                                         | Sigma Aldrich               | C3881       |
| Potassium phosphate monobasic                                            | Sigma Aldrich               | P5655       |
| HEPES                                                                    | Sigma Aldrich               | H3375       |
| Potassium hydroxide                                                      | Sigma Aldrich               | 221473      |
| D-glucose                                                                | Sigma Aldrich               | G7528       |
| Ethanol 190 proof                                                        | Decon labs                  | 2801        |
| Etomoxir                                                                 | Cayman Chemical Company Inc | 11969       |
| Matrigel® Matrix                                                         | Corning                     | 354230      |
| Sodium oleate                                                            | Sigma Aldrich               | O3880       |
| Carbonyl cyanide 4-(trifluoromethoxy)phenylhydrazone (FCCP)              | Sigma Aldrich               | C2920       |
| Antimycin A from Streptomyces sp.                                        | Sigma Aldrich               | A8674       |
| Rotenone                                                                 | Sigma Aldrich               | R8875       |
| Oligomycin A                                                             | Sigma Aldrich               | 75351       |
| Palmitic acid                                                            | Sigma Aldrich               | P0500       |
| Palmitic acid, [1- <sup>14</sup> C]                                      | Moravek Ink                 | MC121       |
| Perchloric acid 70%                                                      | Sigma Aldrich               | 311421      |
| Sodium hydroxide                                                         | Sigma Aldrich               | 221465      |
| Seahorse XF24 FluxPak Cell culture Microplates                           | Agilent                     | 100850-001  |
| Coenzyme A                                                               | Sigma Aldrich               | C4780       |
| DL-Malic acid                                                            | Sigma Aldrich               | M1210       |
| Bovine Serum Albumin                                                     | Sigma Aldrich               | A2153       |
| MOPS                                                                     | Sigma Aldrich               | M1254       |
| Ethylene glycol-bis(2-aminoethylether)-N,N,N',N'-tetraacetic acid (EGTA) | Sigma Aldrich               | E3889       |
| Trypsin-EDTA (0.25%), phenol red                                         | ThermoFisher Scientific     | 25200-056   |
| Nicotinamide (NAM)                                                       | Sigma Aldrich               | 72340       |
| Trichostatin A (TSA)                                                     | Sigma Aldrich               | T8552       |

|                                                              |                                    |                                                                                                                                                                                                                                                 |
|--------------------------------------------------------------|------------------------------------|-------------------------------------------------------------------------------------------------------------------------------------------------------------------------------------------------------------------------------------------------|
| Adenosine 5'-triphosphate (ATP)                              | Sigma Aldrich                      | A7699                                                                                                                                                                                                                                           |
| UniverSol™-ES Liquid Scintillation Cocktail                  | MP Biomedicals                     | IC88248001                                                                                                                                                                                                                                      |
|                                                              |                                    |                                                                                                                                                                                                                                                 |
|                                                              |                                    |                                                                                                                                                                                                                                                 |
|                                                              |                                    |                                                                                                                                                                                                                                                 |
|                                                              |                                    |                                                                                                                                                                                                                                                 |
| <b>Critical Commercial Assays</b>                            |                                    |                                                                                                                                                                                                                                                 |
| Mouse IGF-2 PicoKine™ ELISA Kit                              | Boster Biological Technology       | EK0381                                                                                                                                                                                                                                          |
| Mouse IGF-I ELISA Kit                                        | Sigma-Aldrich                      | RAB0229                                                                                                                                                                                                                                         |
| iTaq™ Universal SYBR® Green Supermix                         | BioRad                             | 1725121                                                                                                                                                                                                                                         |
| Pierce™ BCA Protein Assay Kit                                | ThermoFisher Scientific            | 23225                                                                                                                                                                                                                                           |
|                                                              |                                    |                                                                                                                                                                                                                                                 |
| <b>Deposited Data</b>                                        |                                    |                                                                                                                                                                                                                                                 |
| RNAseq of of Imp2ff and Im2ff/MCKcre+/- gastrocnemius+soleus | GEO: GSE119801                     |                                                                                                                                                                                                                                                 |
|                                                              |                                    |                                                                                                                                                                                                                                                 |
|                                                              |                                    |                                                                                                                                                                                                                                                 |
|                                                              |                                    |                                                                                                                                                                                                                                                 |
| <b>Experimental Models: Organisms/Strains</b>                |                                    |                                                                                                                                                                                                                                                 |
| C57BL/6J mice                                                | The Jackson Laboratory             | 000664                                                                                                                                                                                                                                          |
| B6.FVB(129S4)-Tg(Ckmm-cre)5Khn/J mice                        | The Jackson Laboratory             | 006475                                                                                                                                                                                                                                          |
| IMP2 <sup>fllox</sup> mice                                   | Kind gift from Liliana Minichiello | N/A                                                                                                                                                                                                                                             |
| <b>Oligonucleotides</b>                                      |                                    |                                                                                                                                                                                                                                                 |
| Table of PCR primers-follows                                 |                                    |                                                                                                                                                                                                                                                 |
| Software and Algorithms                                      |                                    |                                                                                                                                                                                                                                                 |
| Expedata-P Data Analysis Software                            | Sable Systems International        | <a href="https://www.sablesys.com/products/classic-line/expedata-p-data-analysis-software/">https://www.sablesys.com/products/classic-line/expedata-p-data-analysis-software/</a>                                                               |
| Volocity 6.3                                                 | Perkin Elmer                       | <a href="http://www.perkinelmer.com/lab-products-and-services/resources/cellular-imaging-software-downloads.html#Volocity">http://www.perkinelmer.com/lab-products-and-services/resources/cellular-imaging-software-downloads.html#Volocity</a> |
| STAR RNA-seq aligner                                         | Dobin et al., 2013                 | <a href="https://code.google.com/archive/p/rna-star/">https://code.google.com/archive/p/rna-star/</a>                                                                                                                                           |
| HTSeq-count                                                  |                                    |                                                                                                                                                                                                                                                 |
|                                                              |                                    | Anders                                                                                                                                                                                                                                          |

|                                                              |                             |                                                                                                                                                                                                                     |                 |
|--------------------------------------------------------------|-----------------------------|---------------------------------------------------------------------------------------------------------------------------------------------------------------------------------------------------------------------|-----------------|
| EdgeR                                                        | Robinson et al., 2010       | <a href="https://bioconductor.org/packages/release/bioc/html/edgeR.html">https://bioconductor.org/packages/release/bioc/html/edgeR.html</a>                                                                         |                 |
| R                                                            | R Core Team, 2018           | <a href="https://www.R-project.org/">https://www.R-project.org/</a>                                                                                                                                                 |                 |
| Other                                                        |                             |                                                                                                                                                                                                                     |                 |
| Prolab <sup>®</sup> Isopro <sup>®</sup> RMH 3000, irradiated | PMI nutrition international | 0006972                                                                                                                                                                                                             |                 |
| Rodent Diet With 60 kcal% Fat, irradiated                    | Research Diets Inc.         | D12492i                                                                                                                                                                                                             |                 |
| Promethion Metabolic Analyzer                                |                             |                                                                                                                                                                                                                     | Sable & Interna |
| EchoMRI Analyzer EMR-153                                     | Echo Medical Systems        | <a href="http://www.echomri.com/Default.aspx">http://www.echomri.com/Default.aspx</a>                                                                                                                               |                 |
| Treadmill                                                    | Columbus instruments        | <a href="http://www.colinst.com/products/treadmill">http://www.colinst.com/products/treadmill</a>                                                                                                                   |                 |
| Lactate Plus Lactate Test Strips                             | Nova biomedical             | 40813                                                                                                                                                                                                               |                 |
| Bayer Contour next Blood glucose test strips                 | Bayer                       | 7309                                                                                                                                                                                                                |                 |
| AlphaTrak2 blood glucose test strips                         | Zoetis                      | 71681-01                                                                                                                                                                                                            |                 |
| Leica CM3050S microtome                                      | Leica Biosystems            | <a href="https://www.leicabiosystems.com/histology-equipment/cryostats/products/leica-cm3050-s/">https://www.leicabiosystems.com/histology-equipment/cryostats/products/leica-cm3050-s/</a>                         |                 |
| Denville UltraClear Microscope Slides                        |                             |                                                                                                                                                                                                                     | Denville Inc.   |
| Sarstedt Inc SC Micro tube 1.3ml K3 EDTA                     | Fischer Scientific          | NC9414041                                                                                                                                                                                                           |                 |
| Amicon Ultra-0.5 mL Centrifugal Filters                      | Millipore Sigma             | UFC500324                                                                                                                                                                                                           |                 |
| Illumina HiSeq2500                                           | Illumina                    | <a href="https://www.illumina.com/systems/sequencing-platforms/hiseq-2500.html">https://www.illumina.com/systems/sequencing-platforms/hiseq-2500.html</a>                                                           |                 |
| CFX96 Touch™ Real-Time PCR Detection System                  | Bio Rad                     | <a href="http://www.bio-rad.com/en-us/product/cfx96-touch-real-time-pcr-detection-system?ID=LJB1YU15">http://www.bio-rad.com/en-us/product/cfx96-touch-real-time-pcr-detection-system?ID=LJB1YU15</a>               |                 |
| TissuLyser II                                                | Qiagen                      | <a href="https://www.qiagen.com/us/search/tissuelyser-ii/">https://www.qiagen.com/us/search/tissuelyser-ii/</a>                                                                                                     |                 |
| 2100 Bioanalyzer Instruments                                 | Agilent                     | <a href="https://www.genomics.agilent.com/en/Bioanalyzer-System/2100-Bioanalyzer-Instruments/?cid=AG-PT-106">https://www.genomics.agilent.com/en/Bioanalyzer-System/2100-Bioanalyzer-Instruments/?cid=AG-PT-106</a> |                 |
| Thermomixer 5350                                             | Eppendorf                   | 5350 21115                                                                                                                                                                                                          |                 |
| Beckman Coulter LS6500 Liquid Scintillation Counter          | Beckman Coulter             | 8043-30-1194                                                                                                                                                                                                        |                 |

|                                       |                 |              |
|---------------------------------------|-----------------|--------------|
| Whatman™ Grade P81                    | GE Healthcare   | WHAT3668-915 |
| 15 mL Tg, Potter-ELV, Serrated Pestle | Wheaton®        | 357984       |
| Glass stirring rod                    | Frey Scientific | 525526       |
|                                       |                 |              |

|               | PCR primers                |                               |
|---------------|----------------------------|-------------------------------|
| Gene          | Forward                    | Reverse                       |
| PPAR $\alpha$ | TCGAGGAAGGCACTACACCT       | TCTTCCCAAAGCTCCTTCAA          |
| PPAR $\beta$  | GGTTGACCTGCAGATGGAAT       | TGGAGCTCGATGACAGTGAC          |
| PPAR $\gamma$ | CGCTGATGCACTGCCTATGA       | AGAGGTCCACAGAGCTGATTCC        |
| PGC1 $\alpha$ | GAATCAAGCCACTACAGACACCG    | CATCCCTCTTGAGCCTTTCGTG        |
| PGC1 $\beta$  | TGGAAAGCCCCTGTGAGAGT       | TTGTATGGAGGTGTGGTGGG          |
| Mef2a         | GTGTACTIONCAGCAATGCCGAC    | AACCCTGAGATAACTGCCCTC         |
| Mef2b         | GCAACGCCTCTTCCAGTATG       | AGTGTCTCAGCAGCTTCTC           |
| Mef2c         | TGCTGGTCTCACCTGGTAAC       | ATCCTTTGATTCAGTATGGCAT        |
| Mef2d         | CAGCAGCCACCTCAGCAACA       | CCAAGTATCCAGCCGCATCC          |
| Myf5          | CTGCTCTGAGCCCACCAG         | GACAGGGCTGTTACATTACAGG        |
| Myf6          | TGCTAAGGAAGGAGGAGCAA       | CCTGCTGGGTGAAGAATGTT          |
| Myh1          | CTTCAACCACCACATGTTTCG      | AGGTTTGGGCTTTTGGAAAGT         |
| Myh2          | AAAGCTCCAAGGACCCTCTT       | AGCTCATGACTGCTGAACTCAC        |
| Myh4          | GCAGGACTTGGTGGACAAAC       | CAGCTTGTGACCTGGGACT           |
| Myh7          | GCCAACTATGCTGGAGCTGATGCCC  | GGTGCCTGGAGCGCAAGTTTGTTCATAAG |
| MyoD          | CTTCTACGCACCTGGACCG        | ACTGTAGTAGGCGGTGTCGT          |
| MyoG          | CTTGCTCAGCTCCCTCAACC       | GTTGGGACCGAACTCCAGTG          |
| Tnni1         | CTGGGCTCTAAGCACAAGGT       | ATGCCAGACATAGCCTCCAC          |
| Tnni2         | CCTGAAGCAGGTCAAGAAGG       | TCCATGCCAGACTTCTCCTC          |
| Tfam          | CAAGTCAGCTGATGGGTATGG      | TTTCCCTGAGCCGAATCATCC         |
| Nrf1          | CAGCACCTTTGGAGAATGTG       | CCTGGGTCATTTTGTCCACA          |
| Nrf2          | GATCCGCCAGCTACTCCCAGGTTG   | CAGGGCAAGCGACTCATGGTCATC      |
| Ndufb2        | CAGGTGATCCAGGGTGAGTT       | CTCGTCATCAGGAGGGATTC          |
| Ndufa3        | ATGGCCGGGAGAATCTCTG        | AGGGGCTAATCATGGGCATAAT        |
| Cox5b         | CAAGGTTACTTCGCGGAGTG       | TCCTTGGTGCCTGAAGCTG           |
| Cox7c         | AGCATGTTGGGCCAGAGT         | ACTGAAAACGGCAAATTCTT          |
| Atp5o         | TCTCGACAGGTTCCGGAGCTT      | AGAGTACAGGGCGGTTGCATA         |
| CD36          | GCTTGCAACTGTCAGCACAT       | GCCTTGCTGTAGCCAAGAAC          |
| IGF2          | CGGACCGAGCCAGGGACGA        | GCCGGCTGGAAGGGAGGAA           |
| 18s rRNA      | GTAACCCGTTGAACCCATT        | CCATCCAATCGGTAGTAGCG          |
| Acaa2         | GCC TCC ACT CAC ATT GGT TT | ATT GAA GAA AGC TGG GCT GA    |
| Acadl         | TGTATCGGTGCCATAGCCA        | CCATTAGTGATGAACACCTTGC        |
| Acadm         | TGGTATTTCTTGTGGCAGG        | CACATTTTCTTAGGCACTCTG         |
| Acadvl        | GGAGGACGACACTTTGCAGG       | AGCGAGCATACTGGGTATTAGA        |
| Acox1         | ACTCGCTGAAGGTGCTGCTCTC     | GTGCTGTCATGCGTTGGAAGTC        |

|                |                               |                                |
|----------------|-------------------------------|--------------------------------|
| Cpt1b          | AAGGAATGCAGGTCCACATC          | CCAGGCTACAGTGGGACATT           |
| Cpt2           | GCTCCGAGGCATTTGTC             | CATCGCTGCTTCTTTGGT             |
| Fabp3          | AGAGTTCGACGAGGTGACAGCA        | TTGTCTCCTGCCCGTTCCACTT         |
| Hadha          | TGCATTTGCCGCAGCTTTAC          | GTTGGCCAGATTTTCGTTCA           |
| Lpl            | ATCGGAGAACTGCTCATGATGA        | CGGATCCTCTCGATGACGAA           |
| MCAD           | GTACCCGTTCCCTCTCATCAAA        | CTCCGTCATCTCCCAAATAC           |
| GAPDH          | CTGGAGAAACCTGCCAAGTA          | TGTTGCTGTAGCCGTATTCA           |
| Cux2           | TCAGTCAACAGCTCCATTCG          | GACAGCGAGAAAGTCCTTGG           |
| Lbx2           | ATGGGTACCCGAAGCACCTTCTGCACCGC | GCGAATTCAATCGTCCACCTGTATCTCCTC |
| NPFF           | CTGCTACTGCTGCTGCTGAATTG       | CAGGAAGGCTGGGCTCCTTCT          |
| Slc16a9        | CCCAATATCTACTTTCTGTTT         | CGTCGCTGTGTATAATAG             |
| Adora2b        | TGCATGCCATCAACTGTATC          | TGGAAACTGTAGCGGAAGTC           |
| Uqcrc2         | CCCATCTTGCTTTGCTGTCTG         | AATAAAATCTCGAGAAGGACCCG        |
| Lars2          | ATCCAGTGGA TCAAACAGTG         | GTACCACTCTGGGAGGTCT            |
| $\beta$ -actin | TGTCCACCTTCCAGCAGATGT         | AGCTCAGTAACAGTCCGCCTAGA        |
| MHC-I          | CTCCCAAGGAGAGACGACTG          | TTAAGCAGGTCGGCTGAGTT           |
| MHC-IIa        | AAAGCTCCAAGGACCCTCTT          | AGCTCATGACTGCTGAACTCAC         |
| MHC-IIb        | TGGCCGAGCAAGAGCTAC            | TTGATGAGGCTGGTGTCTG            |
| MHC-IIx        | AATCAAAGGTCAAGGCCTACAA        | GAATTTGCCAGGTTGACAT            |
